# Supplementary material
Source: publisher site journal article supplement (https://www.spandidos-publications.com/850/downloadSupplementary)
Supplement: Supplementary file 1 [file downloadSupplementary]

Table SI. Demographics and clinical characteristics of patients in the training and external validation cohort.

| Demographic or clinicopathologic characteristic | Training cohort (n=1,473) |       | Validation cohort (n=638) |       |
|-------------------------------------------------|---------------------------|-------|---------------------------|-------|
|                                                 | Patients, n               | %     | Patients, n               | %     |
| Age, years                                      |                           |       |                           |       |
| ≤75                                             | 1,321                     | 89.68 | 565                       | 88.56 |
| >75                                             | 152                       | 10.32 | 73                        | 11.44 |
| Sex                                             |                           |       |                           |       |
| Female                                          | 995                       | 67.55 | 487                       | 76.33 |
| Male                                            | 478                       | 32.45 | 151                       | 23.67 |
| Ethnicity                                       |                           |       |                           |       |
| White                                           | 1,336                     | 90.70 | 574                       | 89.97 |
| Black                                           | 137                       | 9.30  | 64                        | 10.03 |
| Marital status at diagnosis                     |                           |       |                           |       |
| Married                                         | 625                       | 42.43 | 296                       | 46.39 |
| Divorced+separated+widowed                      | 441                       | 29.94 | 174                       | 27.27 |
| Single                                          | 407                       | 27.63 | 168                       | 26.34 |
| Histology                                       |                           |       |                           |       |
| Basaloid carcinoma                              | 35                        | 2.38  | 3                         | 0.47  |
| Cloacogenic carcinoma                           | 109                       | 7.40  | 16                        | 2.51  |
| Squamous cell carcinoma                         | 1,329                     | 90.22 | 619                       | 97.02 |
| Grade                                           |                           |       |                           |       |
| Well differentiated                             | 111                       | 7.54  | 43                        | 6.74  |
| Moderately differentiated                       | 465                       | 31.57 | 194                       | 30.41 |
| Poorly differentiated                           | 451                       | 30.62 | 198                       | 31.03 |
| Undifferentiated; anaplastic                    | 14                        | 0.95  | 9                         | 1.41  |
| Unknown                                         | 432                       | 29.32 | 194                       | 30.41 |
| T 6th                                           |                           |       |                           |       |
| T1                                              | 287                       | 19.48 | 110                       | 17.24 |
| T2                                              | 771                       | 52.34 | 329                       | 51.57 |
| T3                                              | 273                       | 18.53 | 128                       | 20.06 |
| T4                                              | 142                       | 9.65  | 71                        | 11.13 |
| N 6th                                           |                           |       |                           |       |
| N0                                              | 1,029                     | 69.86 | 392                       | 61.44 |
| N1                                              | 160                       | 10.86 | 76                        | 11.91 |
| N2                                              | 179                       | 12.15 | 99                        | 15.52 |
| N3                                              | 105                       | 7.13  | 71                        | 11.13 |
| Stage 6th                                       |                           |       |                           |       |
| I                                               | 247                       | 16.77 | 87                        | 13.64 |
| II                                              | 709                       | 48.13 | 278                       | 43.57 |
| IIIA                                            | 216                       | 14.66 | 91                        | 14.26 |
| IIIB                                            | 301                       | 20.44 | 182                       | 28.53 |
| Number of cancer-specific dead/N                | 343/1,473                 | 23.29 | 106/638                   | 16.61 |
| Number of dead/N                                | 509/1,473                 | 34.56 | 146/638                   | 22.88 |
| 1-year cumulative overall survival              | 1,358/1,473               | 92.19 | 591/638                   | 92.63 |
| 3-year cumulative overall survival              | 1,129/1,473               | 76.65 | 488/638                   | 76.49 |
| 5-year cumulative overall survival              | 1,004/1,473               | 68.16 | -                         | -     |

-, no related data. T6th, T category from the sixth edition of the American Joint Committee on Cancer TNM classification; N6th, N category from the sixth edition of the American Joint Committee on Cancer TNM classification; Stage 6th, stage category from the sixth edition of the American Joint Committee on Cancer TNM classification.

Table SII. Univariate and multivariate analyses for cancer-specific survival.

| Variable                             | Univariate analysis P-value | Multivariate analysis |         | Included factors for construction of the nomogram |         |
|--------------------------------------|-----------------------------|-----------------------|---------|---------------------------------------------------|---------|
|                                      |                             | Hazard ratio (95% CI) | P-value | Hazard ratio (95% CI)                             | P-value |
| Age, years                           | <0.001                      |                       | <0.001  |                                                   | <0.001  |
| ≤75                                  |                             | Reference             |         | Reference                                         |         |
| >75                                  |                             | 2.202 (1.618-2.996)   |         | 2.202 (1.618-2.996)                               |         |
| Sex                                  | <0.001                      |                       | <0.001  |                                                   | <0.001  |
| Female                               |                             | Reference             |         | Reference                                         |         |
| Male                                 |                             | 1.952 (1.549-2.460)   |         | 1.952 (1.549-2.460)                               |         |
| Ethnicity                            | <0.001                      |                       | 0.005   |                                                   | 0.005   |
| White                                |                             | Reference             |         | Reference                                         |         |
| Black                                |                             | 1.555 (1.140-2.122)   |         | 1.555 (1.140-2.122)                               |         |
| Marital status at diagnosis          | <0.001                      |                       | 0.033   |                                                   | 0.033   |
| Married                              |                             | Reference             |         | Reference                                         |         |
| Divorced+separated+widowed           |                             | 1.339 (1.018-1.762)   |         | 1.339 (1.018-1.762)                               |         |
| Single                               |                             | 1.412 (1.064-1.873)   |         | 1.412 (1.064-1.873)                               |         |
| Histology                            | 0.227                       |                       |         |                                                   |         |
| Basaloid carcinoma                   |                             |                       |         |                                                   |         |
| Cloacogenic carcinoma                |                             |                       |         |                                                   |         |
| Squamous cell carcinoma              |                             |                       |         |                                                   |         |
| Grade                                | 0.103                       |                       |         |                                                   |         |
| Well differentiated                  |                             |                       |         |                                                   |         |
| Moderately differentiated            |                             |                       |         |                                                   |         |
| Poorly differentiated                |                             |                       |         |                                                   |         |
| Undifferentiated; anaplastic unknown |                             |                       |         |                                                   |         |
| T6th                                 | <0.001                      |                       | <0.001  |                                                   | <0.001  |
| T1                                   |                             | Reference             |         | Reference                                         |         |
| T2                                   |                             | 2.134 (1.425-3.196)   |         | 2.134 (1.425-3.196)                               |         |
| T3                                   |                             | 3.186 (2.062-4.924)   |         | 3.186 (2.062-4.924)                               |         |
| T4                                   |                             | 4.880 (3.093-7.699)   |         | 4.880 (3.093-7.699)                               |         |
| N6th                                 | <0.001                      |                       | <0.001  |                                                   | <0.001  |
| N0                                   |                             | Reference             |         | Reference                                         |         |
| N1                                   |                             | 1.293 (0.919-1.820)   |         | 1.293 (0.919-1.820)                               |         |
| N2                                   |                             | 1.836 (1.369-2.461)   |         | 1.836 (1.369-2.461)                               |         |
| N3                                   |                             | 2.200 (1.575-3.072)   |         | 2.200 (1.575-3.072)                               |         |
| Stage 6th                            | <0.001                      |                       |         |                                                   |         |
| I                                    |                             |                       |         |                                                   |         |
| II                                   |                             |                       |         |                                                   |         |
| IIIA                                 |                             |                       |         |                                                   |         |
| IIIB                                 |                             |                       |         |                                                   |         |

T6th, T category from the sixth edition of the American Joint Committee on Cancer TNM classification; N6th, N category from the sixth edition of the American Joint Committee on Cancer TNM classification; Stage 6th, stage category from the sixth edition of the American Joint Committee on Cancer TNM classification.

Table SIII. Univariate and multivariate analyses of overall survival.

| Variable                     | Univariate analysis P-value | Multivariate analysis |         | Included factors for construction of the nomogram |         |
|------------------------------|-----------------------------|-----------------------|---------|---------------------------------------------------|---------|
|                              |                             | Hazard ratio (95% CI) | P-value | Hazard ratio (95% CI)                             | P-value |
| Age, years                   | <0.001                      |                       |         |                                                   |         |
| ≤75                          |                             | Reference             | <0.001  | Reference                                         | <0.001  |
| >75                          |                             | 2.626 (2.076-3.322)   |         | 2.626 (2.076-3.322)                               |         |
| Sex                          | <0.001                      |                       |         |                                                   |         |
| Female                       |                             | Reference             | <0.001  | Reference                                         | <0.001  |
| Male                         |                             | 1.716 (1.416-2.080)   |         | 1.716 (1.416-2.080)                               |         |
| Ethnicity                    | <0.001                      |                       |         |                                                   |         |
| White                        |                             | Reference             | <0.001  | Reference                                         | <0.001  |
| Black                        |                             | 1.636 (1.265-2.115)   |         | 1.636 (1.265-2.115)                               |         |
| Marital status at diagnosis  | <0.001                      |                       | 0.001   |                                                   | 0.001   |
| Married                      |                             | Reference             |         | Reference                                         |         |
| Divorced+separated+widowed   |                             | 1.447 (1.159-1.806)   |         | 1.447 (1.159-1.806)                               |         |
| Single                       |                             | 1.442 (1.141-1.824)   |         | 1.442 (1.141-1.824)                               |         |
| Histology                    | 0.475                       |                       |         |                                                   |         |
| Basaloid carcinoma           |                             |                       |         |                                                   |         |
| Cloacogenic carcinoma        |                             |                       |         |                                                   |         |
| Squamous cell carcinoma      |                             |                       |         |                                                   |         |
| Grade                        | 0.418                       |                       |         |                                                   |         |
| Well differentiated          |                             |                       |         |                                                   |         |
| Moderately differentiated    |                             |                       |         |                                                   |         |
| Poorly differentiated        |                             |                       |         |                                                   |         |
| Undifferentiated; anaplastic |                             |                       |         |                                                   |         |
| Unknown                      |                             |                       |         |                                                   |         |
| T6th                         | <0.001                      |                       | <0.001  |                                                   | <0.001  |
| T1                           |                             | Reference             |         | Reference                                         |         |
| T2                           |                             | 1.714 (1.283-2.289)   |         | 1.714 (1.283-2.289)                               |         |
| T3                           |                             | 2.332 (1.685-3.226)   |         | 2.332 (1.685-3.226)                               |         |
| T4                           |                             | 3.252 (2.291-4.617)   |         | 3.252 (2.291-4.617)                               |         |
| N6th                         | <0.001                      |                       | <0.001  |                                                   | <0.001  |
| N0                           |                             | Reference             |         | Reference                                         |         |
| N1                           |                             | 1.075 (0.803-1.440)   |         | 1.075 (0.803-1.440)                               |         |
| N2                           |                             | 1.510 (1.174-1.942)   |         | 1.510 (1.174-1.942)                               |         |
| N3                           |                             | 1.744 (1.297-2.346)   |         | 1.744 (1.297-2.346)                               |         |
| Stage 6th                    | <0.001                      |                       |         |                                                   |         |
| I                            |                             |                       |         |                                                   |         |
| II                           |                             |                       |         |                                                   |         |
| IIIA                         |                             |                       |         |                                                   |         |
| IIIB                         |                             |                       |         |                                                   |         |

T6th, T category from the sixth edition of the American Joint Committee on Cancer TNM classification; N6th, N category from the sixth edition of the American Joint Committee on Cancer TNM classification; Stage 6th, stage category from the sixth edition of the American Joint Committee on Cancer TNM classification.

Table SIV. Prognostic scores of variables in the nomograms.

| Variable and prognostic score | Score (nomogram of CSS) | Mean of estimated 5-year CSS, % | Score (nomogram of OS) | Mean of estimated 5-year OS, % |
|-------------------------------|-------------------------|---------------------------------|------------------------|--------------------------------|
| Age, years                    |                         |                                 |                        |                                |
| ≤75                           | 0                       |                                 | 0                      |                                |
| >75                           | 4.98                    |                                 | 8.19                   |                                |
| Sex                           |                         |                                 |                        |                                |
| Female                        | 0                       |                                 | 0                      |                                |
| Male                          | 4.22                    |                                 | 4.57                   |                                |
| Ethnicity                     |                         |                                 |                        |                                |
| White                         | 0                       |                                 | 0                      |                                |
| Black                         | 2.79                    |                                 | 4.17                   |                                |
| Marital status at diagnosis   |                         |                                 |                        |                                |
| Married                       | 0                       |                                 | 0                      |                                |
| Divorced+separated+widowed    | 1.84                    |                                 | 3.12                   |                                |
| Single                        | 2.18                    |                                 | 3.11                   |                                |
| T6th                          |                         |                                 |                        |                                |
| T1                            | 0                       |                                 | 0                      |                                |
| T2                            | 4.77                    |                                 | 4.56                   |                                |
| T3                            | 7.30                    |                                 | 7.17                   |                                |
| T4                            | 10.00                   |                                 | 10.00                  |                                |
| N6th                          |                         |                                 |                        |                                |
| N0                            | 0                       |                                 | 0                      |                                |
| N1                            | 1.62                    |                                 | 0.62                   |                                |
| N2                            | 3.83                    |                                 | 3.50                   |                                |
| N3                            | 4.99                    |                                 | 4.74                   |                                |
| Total prognostic score (CSS)  |                         |                                 |                        |                                |
| 0-11.00                       |                         | 86.63                           |                        |                                |
| 11.00-14.50                   |                         | 70.43                           |                        |                                |
| ≥14.50                        |                         | 45.16                           |                        |                                |
| Total prognostic score (OS)   |                         |                                 |                        |                                |
| 0-8.30                        |                         |                                 |                        | 83.49                          |
| 8.30-13.80                    |                         |                                 |                        | 69.40                          |
| ≥13.80                        |                         |                                 |                        | 44.54                          |

T6th, T category from the sixth edition of the American Joint Committee on Cancer TNM classification; N6th, N category from the sixth edition of the American Joint Committee on Cancer TNM classification; CSS, cancer-specific survival; OS, overall survival.

Table SV. Variance inflation factor.

| Variable                    | Variance inflation factor |                  |
|-----------------------------|---------------------------|------------------|
|                             | Cancer-specific survival  | Overall survival |
| Age                         |                           |                  |
| ≤75 years old               | Reference                 | Reference        |
| >75 years old               | 1.09                      | 1.09             |
| Sex                         |                           |                  |
| Female                      | Reference                 | Reference        |
| Male                        | 1.18                      | 1.19             |
| Ethnicity                   |                           |                  |
| White                       | Reference                 | Reference        |
| Black                       | 1.09                      | 1.07             |
| Marital status at diagnosis |                           |                  |
| Married                     | Reference                 | Reference        |
| Divorced+separated+widowed  | 1.48                      | 1.49             |
| Single                      | 1.66                      | 1.64             |
| T6th                        |                           |                  |
| T1                          | Reference                 | Reference        |
| T2                          | 3.61                      | 2.77             |
| T3                          | 3.36                      | 2.58             |
| T4                          | 2.81                      | 2.13             |
| N6th                        |                           |                  |
| N0                          | Reference                 | Reference        |
| N1                          | 1.10                      | 1.07             |
| N2                          | 1.15                      | 1.11             |
| N3                          | 1.24                      | 1.19             |

Normal range of variance inflation factor: 0-10. T6th, T category from the sixth edition of the American Joint Committee on Cancer TNM classification; N6th, N category from the sixth edition of the American Joint Committee on Cancer TNM classification.
